# Supplementary material
Source: PubMed Central journal article supplement (PMC6178083)
Supplement: 12250_2018_18_MOESM1_ESM.pdf [file 12250_2018_18_MOESM1_ESM.pdf]

VIROLOGICA SINICA

**Electronic Supplementary Material****Development of multi-analyte suspension assay for simultaneously efficient detection of avian influenza virus A subtypes**

Yi Li, Longquan Ni, Jianjun Chen, Juan Yang, Fei Deng, Hualin Wang✉

State Key Laboratory of Virology, Wuhan Institute of Virology, Chinese Academy of Sciences, Wuhan 430071, China

Supporting information to DOI: 10.1007/s12250-018-0018-1

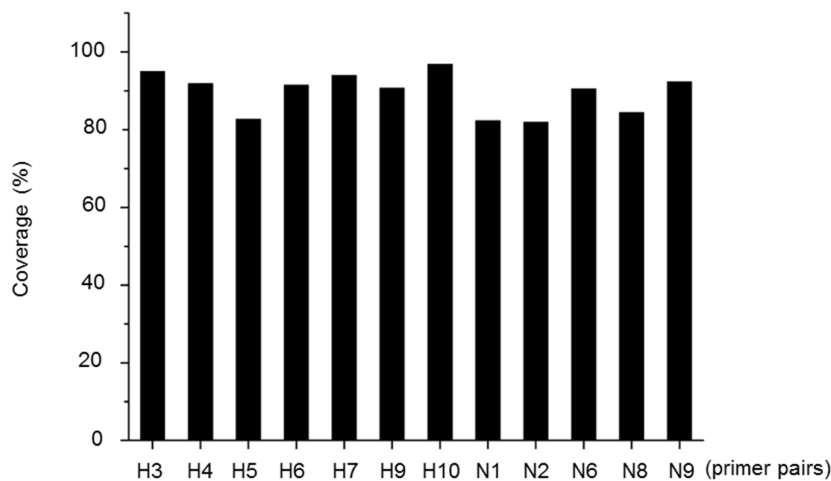

Supplementary Figure S1. The coverage of each primer pairs. We use 12 subtypes of AIVs sequences as template database to run a virtual PCR amplification to predict successful amplicons with 19 pairs of designed primers. The percentages of predicted amplicons represent the coverage (sensitivity) of each primer pairs. The coverage of each primer pairs ranged from 82% to 97%.

Supplementary Table S1. Accession numbers of 27,549 Asian AIVs subtypes sequences downloaded from NCBI and GISAID database.

Supplementary Table S2. Subtype-specific primers evaluated by thermodynamics-based MFEprimer-2.0.

| data base | Predicted amplicons |             |               |               |             |               |           |               |               |               |             |             |
|-----------|---------------------|-------------|---------------|---------------|-------------|---------------|-----------|---------------|---------------|---------------|-------------|-------------|
|           | H3                  | H4          | H5            | H6            | H7          | H9            | H10       | N1            | N2            | N6            | N8          | N9          |
| H3        | 262/<br>276         | 0           | 0             | 0             | 0           | 0             | 0         | 0             | 0             | 0             | 0           | 0           |
| H4        | 0                   | 257/<br>280 | 0             | 0             | 0           | 0             | 0         | 0             | 0             | 0             | 0           | 0           |
| H5        | 0                   | 0           | 5874/<br>7107 | 0             | 0           | 0             | 0         | 0             | 0             | 0             | 0           | 0           |
| H6        | 0                   | 0           | 0             | 1445/<br>1581 | 0           | 0             | 0         | 0             | 0             | 0             | 0           | 0           |
| H7        | 0                   | 0           | 0             | 0             | 700/<br>745 | 0             | 0         | 0             | 0             | 0             | 0           | 0           |
| H9        | 0                   | 0           | 0             | 0             | 0           | 4272/<br>4711 | 0         | 0             | 0             | 0             | 0           | 0           |
| H10       | 0                   | 0           | 0             | 0             | 0           | 0             | 93/<br>96 | 0             | 0             | 0             | 0           | 0           |
| N1        | 0                   | 0           | 0             | 0             | 0           | 0             | 0         | 4103/<br>4986 | 0             | 0             | 0           | 0           |
| N2        | 0                   | 0           | 0             | 0             | 0           | 0             | 0         | 0             | 3933/<br>4799 | 0             | 0           | 0           |
| N6        | 0                   | 0           | 0             | 0             | 0           | 0             | 0         | 0             | 0             | 1453/<br>1605 | 0           | 0           |
| N8        | 0                   | 0           | 0             | 0             | 0           | 0             | 0         | 0             | 0             | 0             | 546/<br>647 | 0           |
| N9        | 0                   | 0           | 0             | 0             | 0           | 0             | 0         | 0             | 0             | 0             | 0           | 663/<br>716 |
